# Supplementary material for: A simple and novel method for the direct conversion of carboxylic acids into thioamides
Source: Royal Society of Chemistry journal article supplement (doi:10.1039/c3ra23414b), 2013-01-01

## Supporting Information

# A Direct Conversion of Carboxylic Acids into Thioamides

*Babak Kaboudin,\*<sup>a</sup> Vahid Yarahmadi,<sup>a</sup> Jun-ya Kato<sup>b</sup> and Tsutomu Yokomatsu<sup>b</sup>*

<sup>a</sup>*Department of Chemistry, Institute for Advanced Studies in Basic Sciences  
Gava Zang, Zanjan 45137-66731, Iran  
Fax: (+98) 241-4214949  
E-mail: [kaboudin@iasbs.ac.ir](mailto:kaboudin@iasbs.ac.ir)*

<sup>b</sup>*School of Pharmacy, Tokyo University of Pharmacy and Life Science  
14321-1 Horinouchi, Hachioji, Tokyo 192-0392, Japan*

### Table of Contents

|                                                                          |      |
|--------------------------------------------------------------------------|------|
| NMR spectra of compounds <b>1b-1e</b> , <b>3f-3q</b> , <b>4-7b</b> ..... | 2-23 |
|--------------------------------------------------------------------------|------|

$^{31}\text{P}$ -NMR of compound **1b**

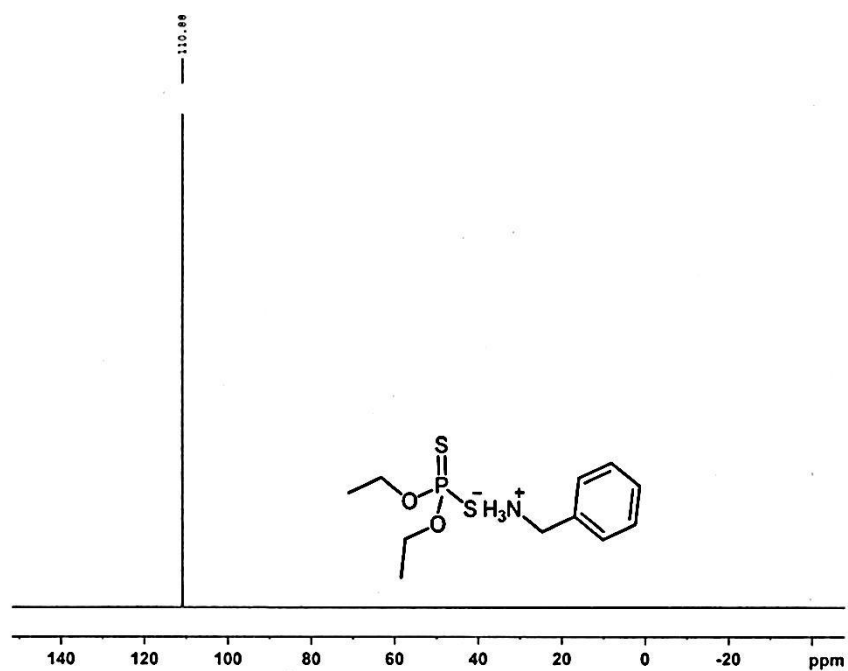

$^1\text{H}$ -NMR of compound **1b**

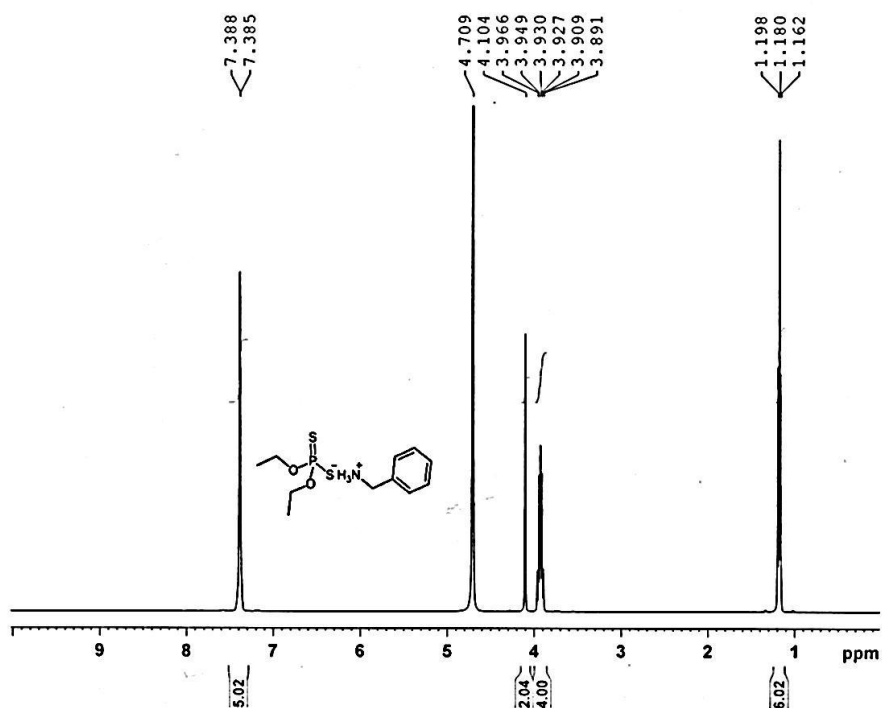

$^{13}\text{C}$ -NMR of compound **1b**

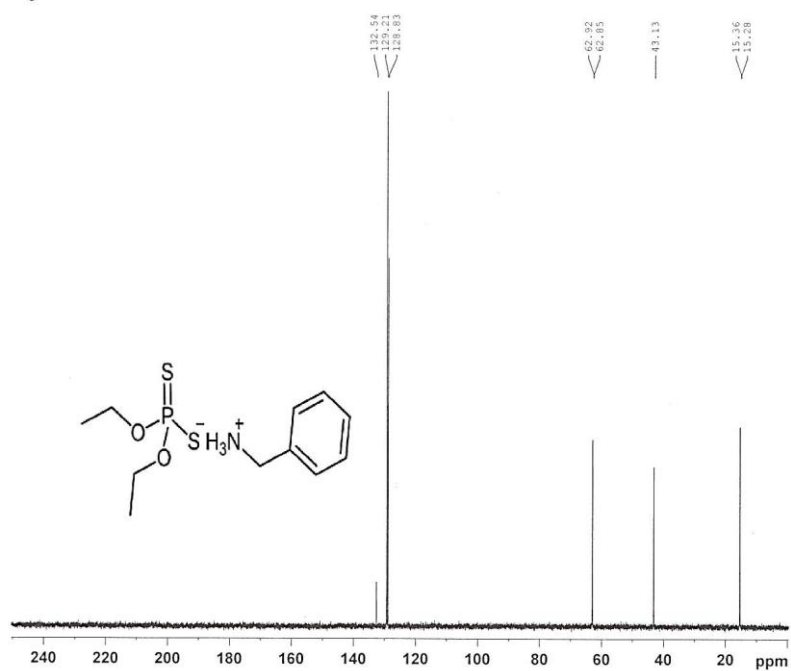

$^{31}\text{P}$ -NMR of compound **1c**

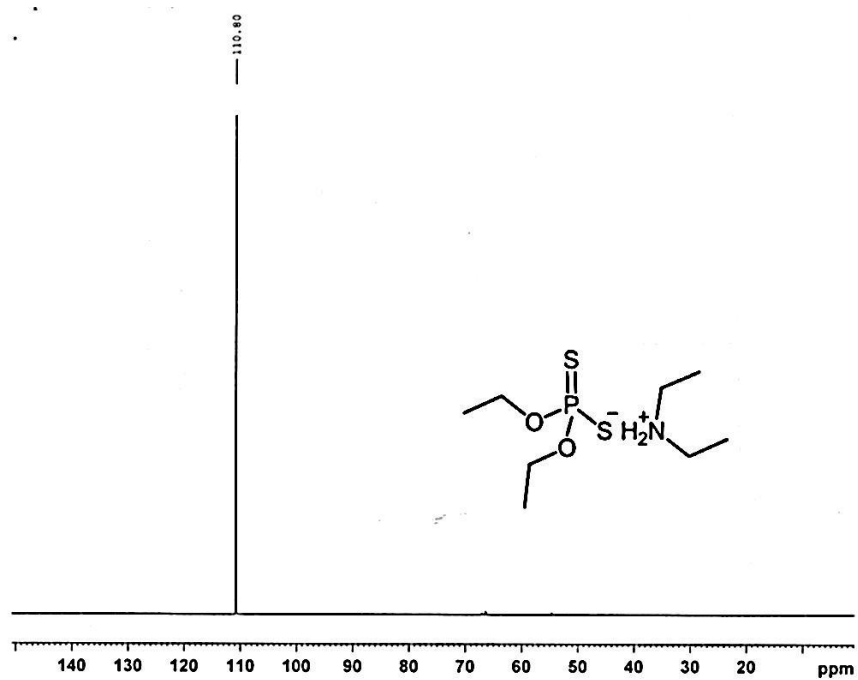

$^1\text{H}$ -NMR of compound **1c**

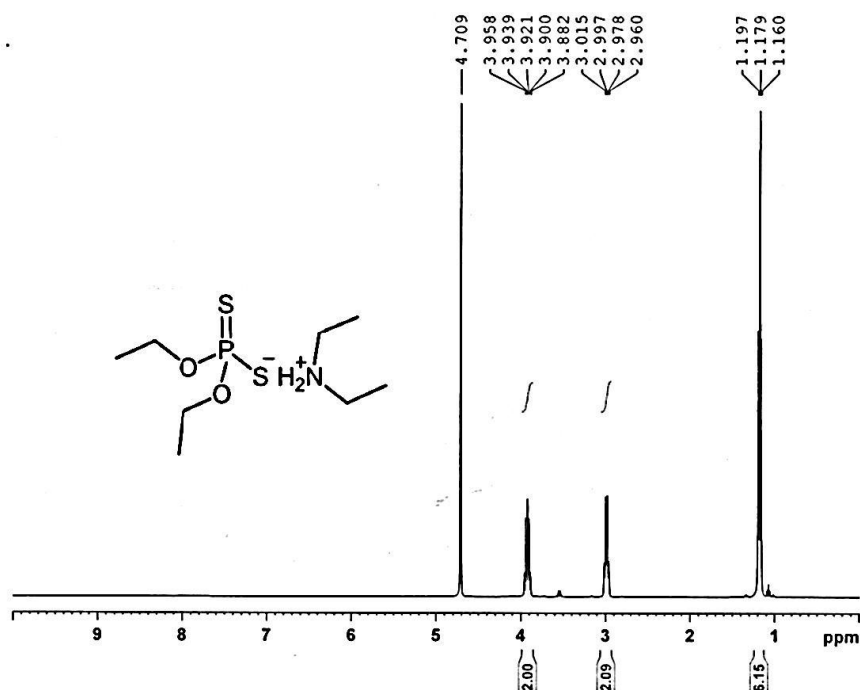

$^{13}\text{C}$ -NMR of compound **1c**

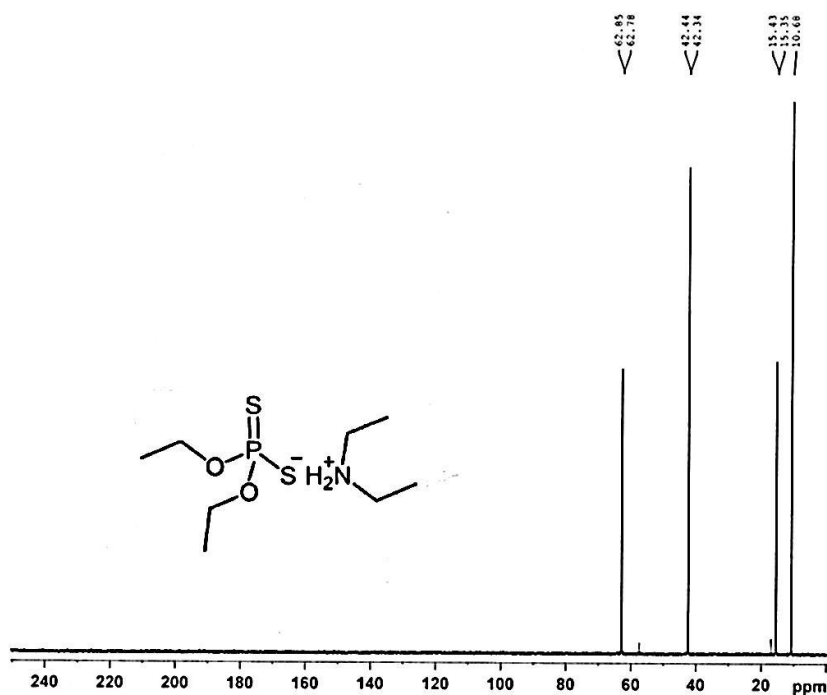

# <sup>31</sup>P-NMR of compound **1d**

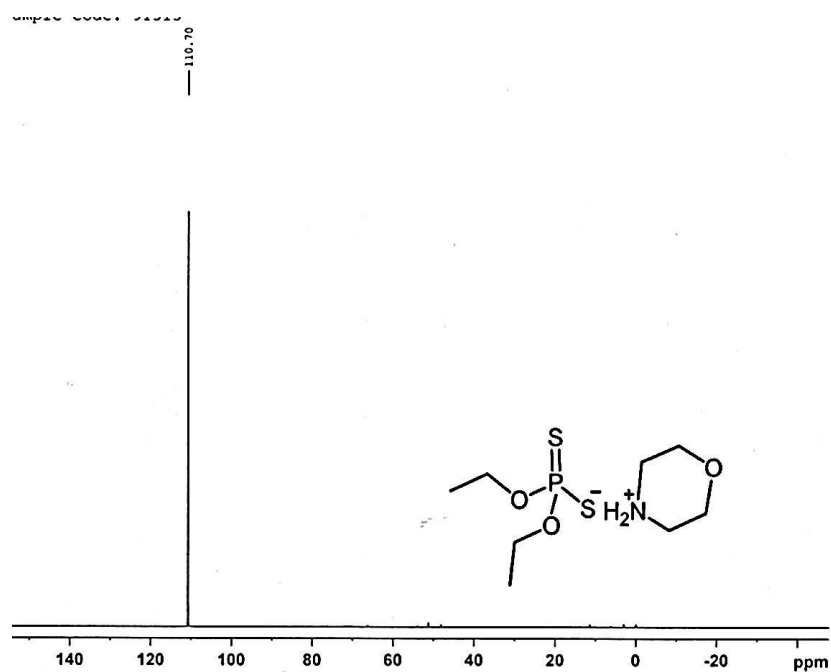

# <sup>1</sup>H-NMR of compound **1d**

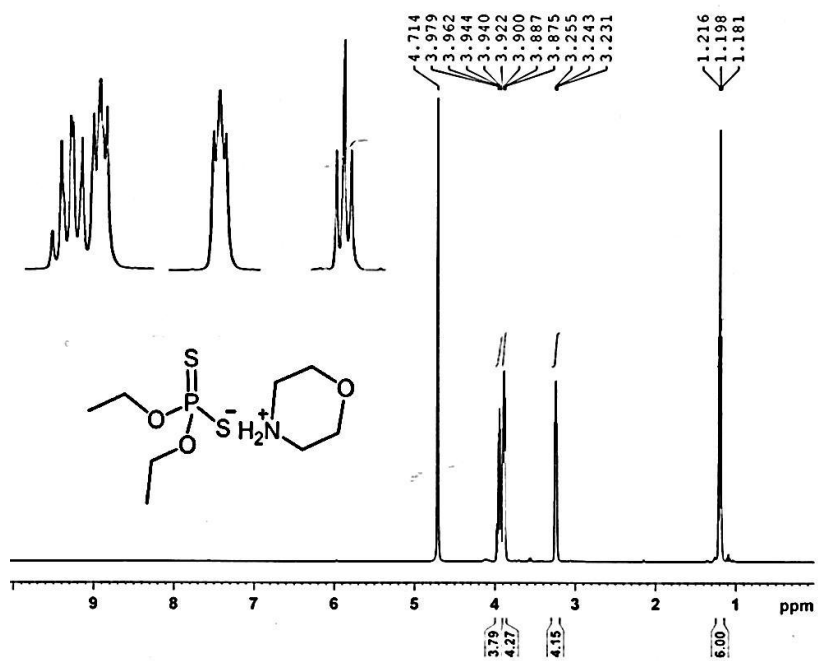

$^{13}\text{C}$ -NMR of compound **1d**

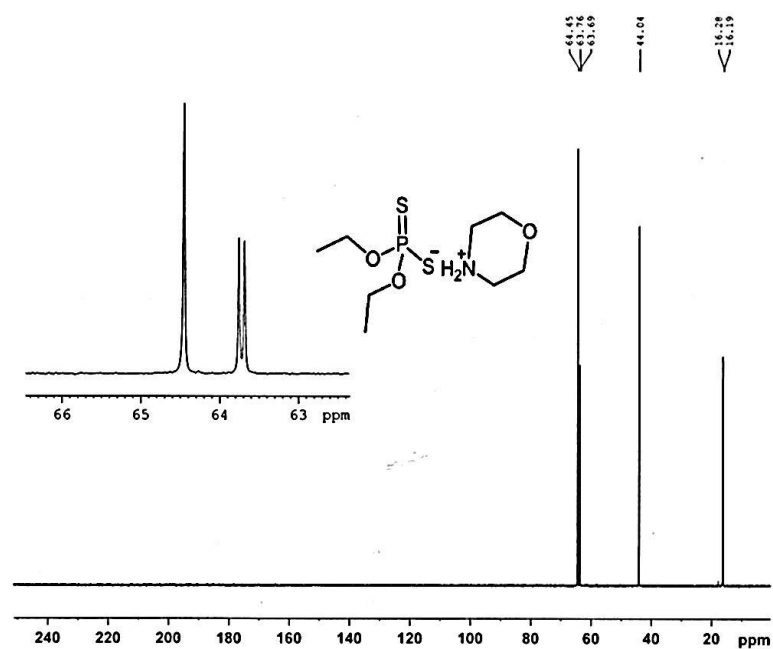

$^{31}\text{P}$ -NMR of compound **1e**

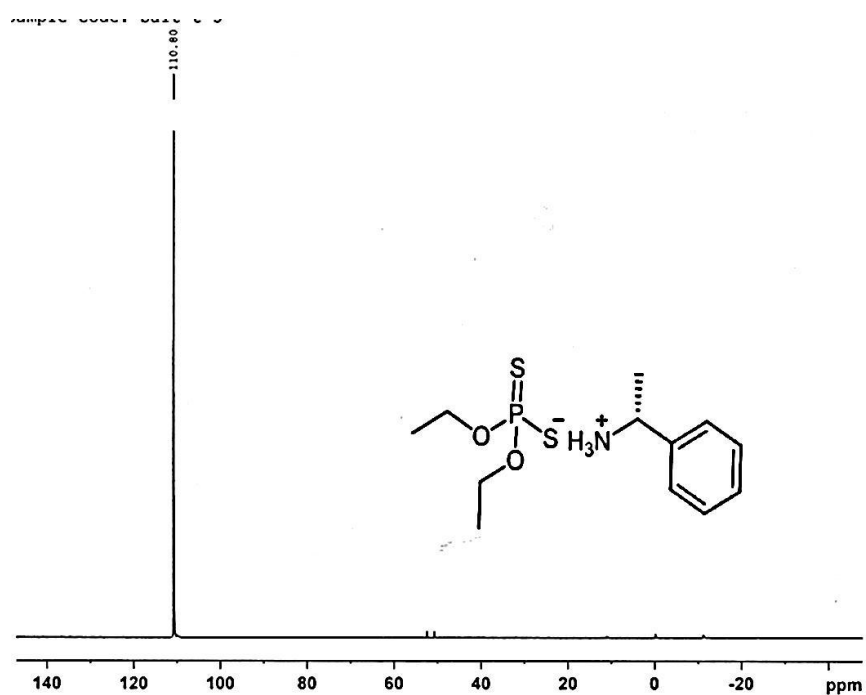

<sup>1</sup>H-NMR of compound **1e**

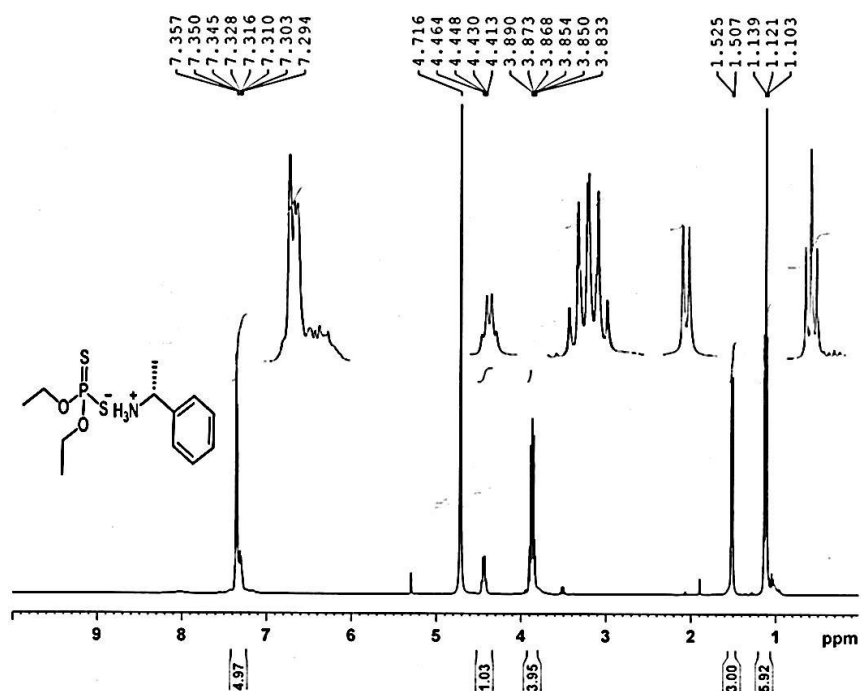

<sup>13</sup>C-NMR of compound **1e**

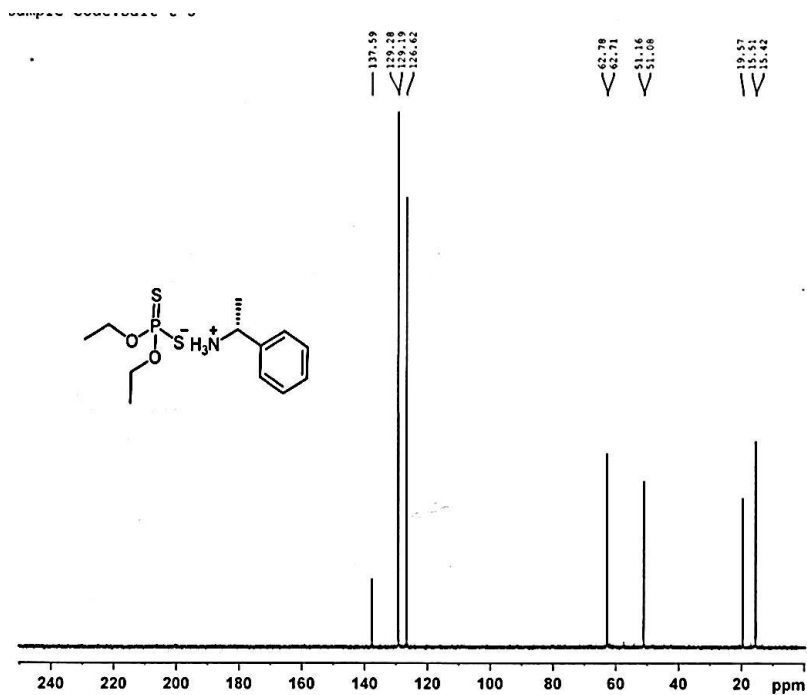

$^1\text{H}$ -NMR **3f**

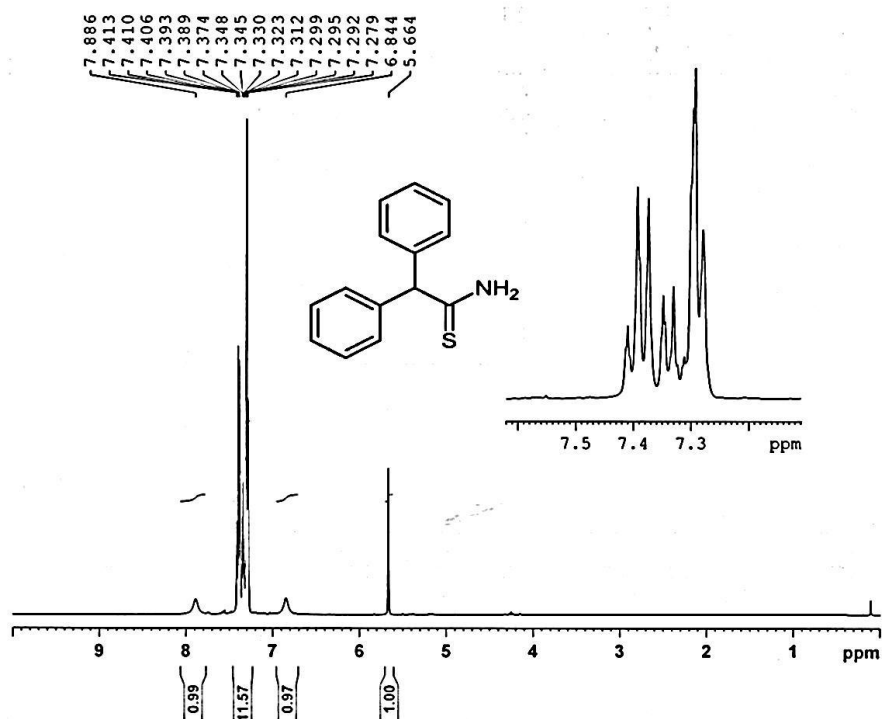

$^{13}\text{C}$ -NMR **3f**

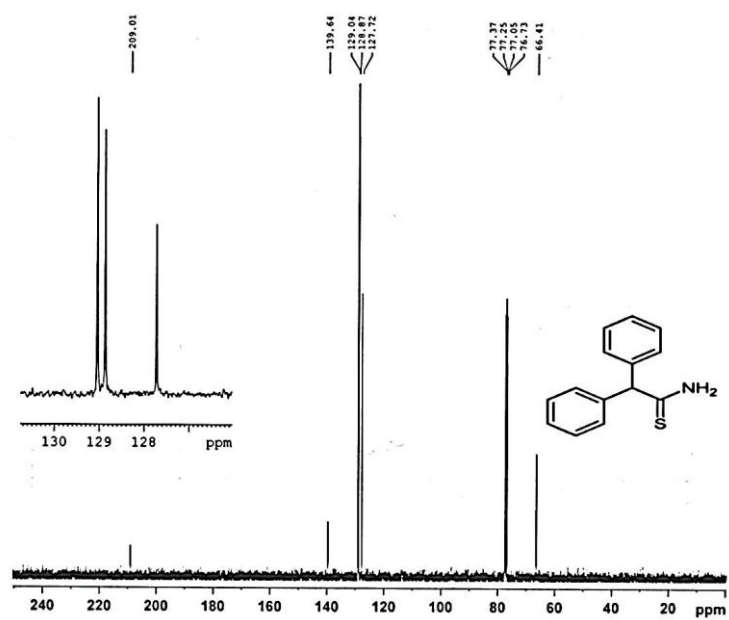

$^1\text{H}$ -NMR **3g**



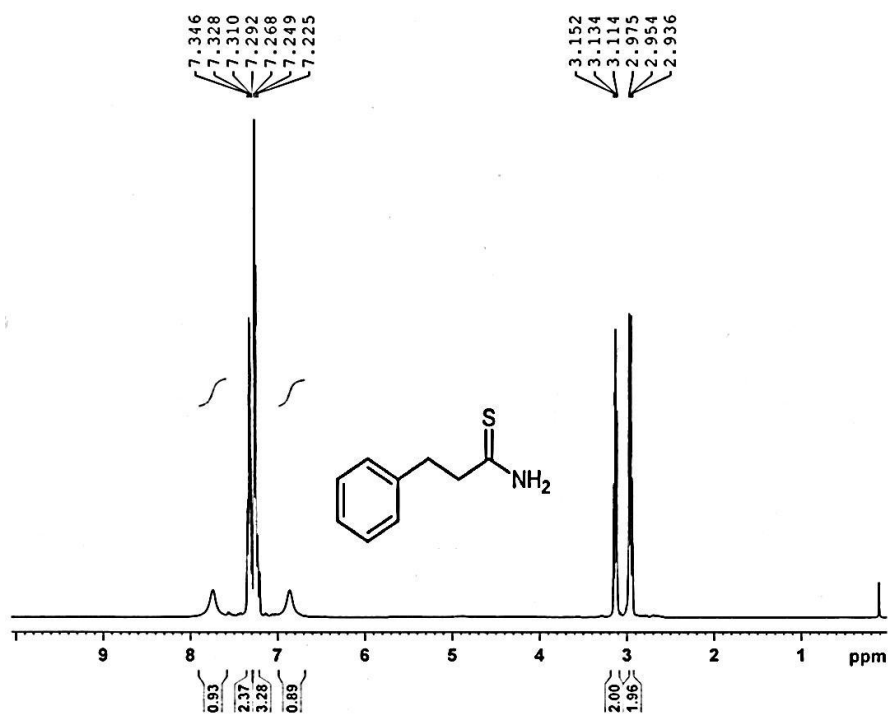

<sup>13</sup>C-NMR 3g

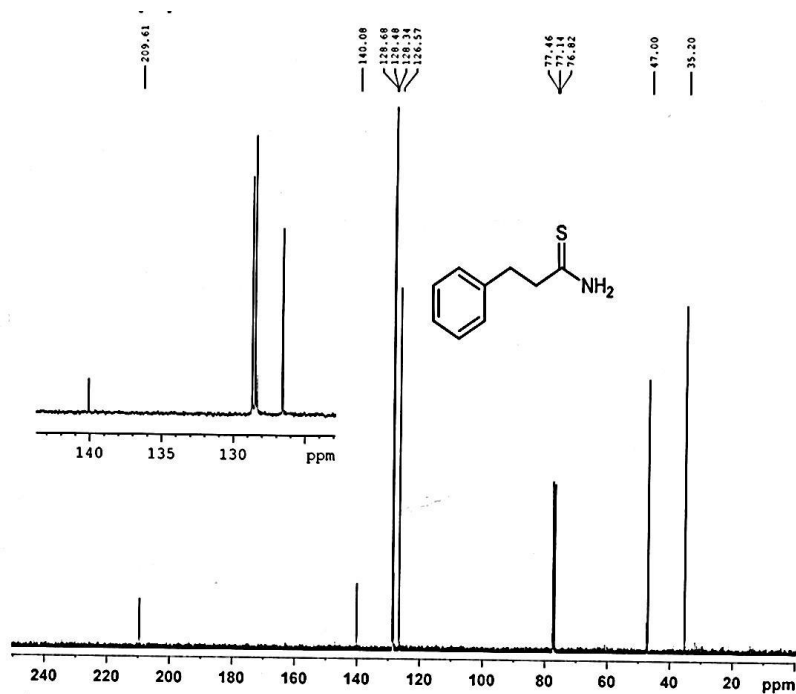

<sup>1</sup>H-NMR 3h

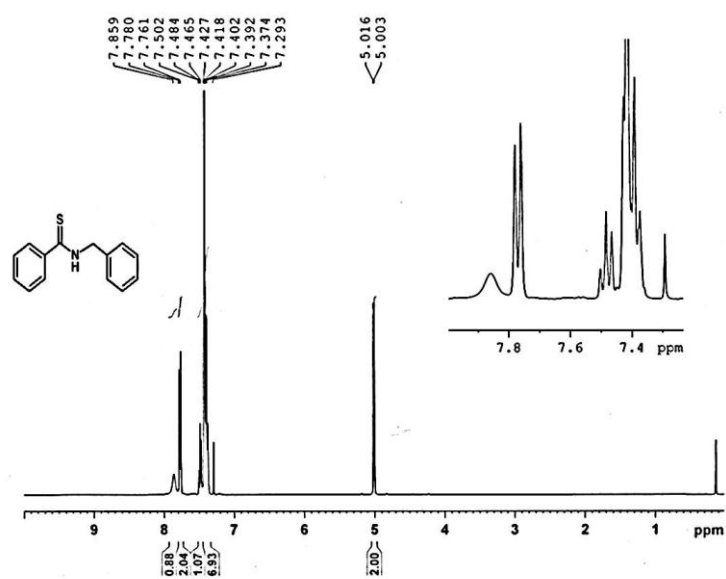

**<sup>13</sup>C-NMR 3h**

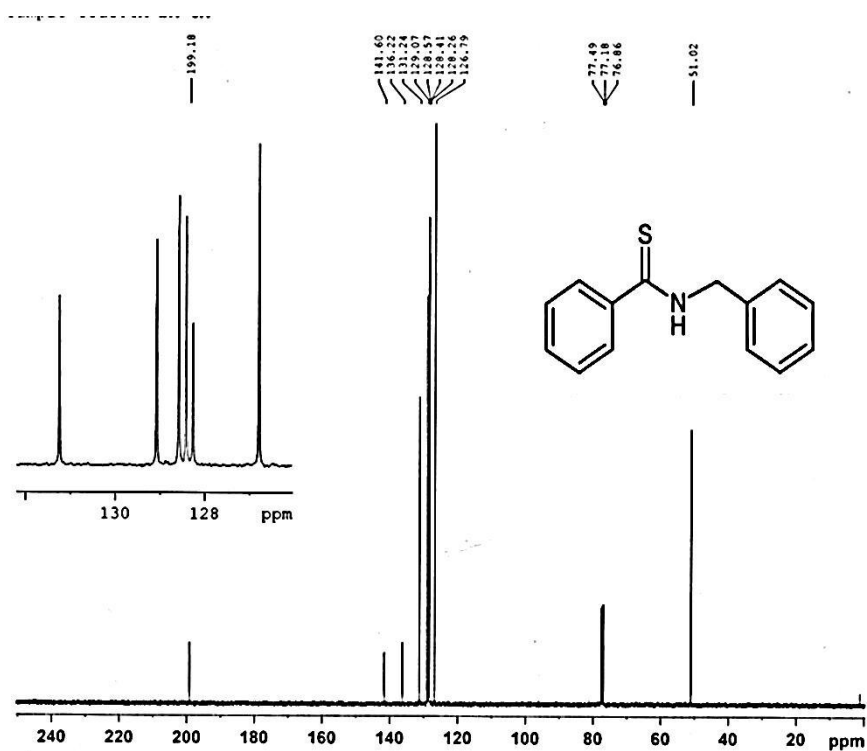

**<sup>1</sup>H-NMR 3i**

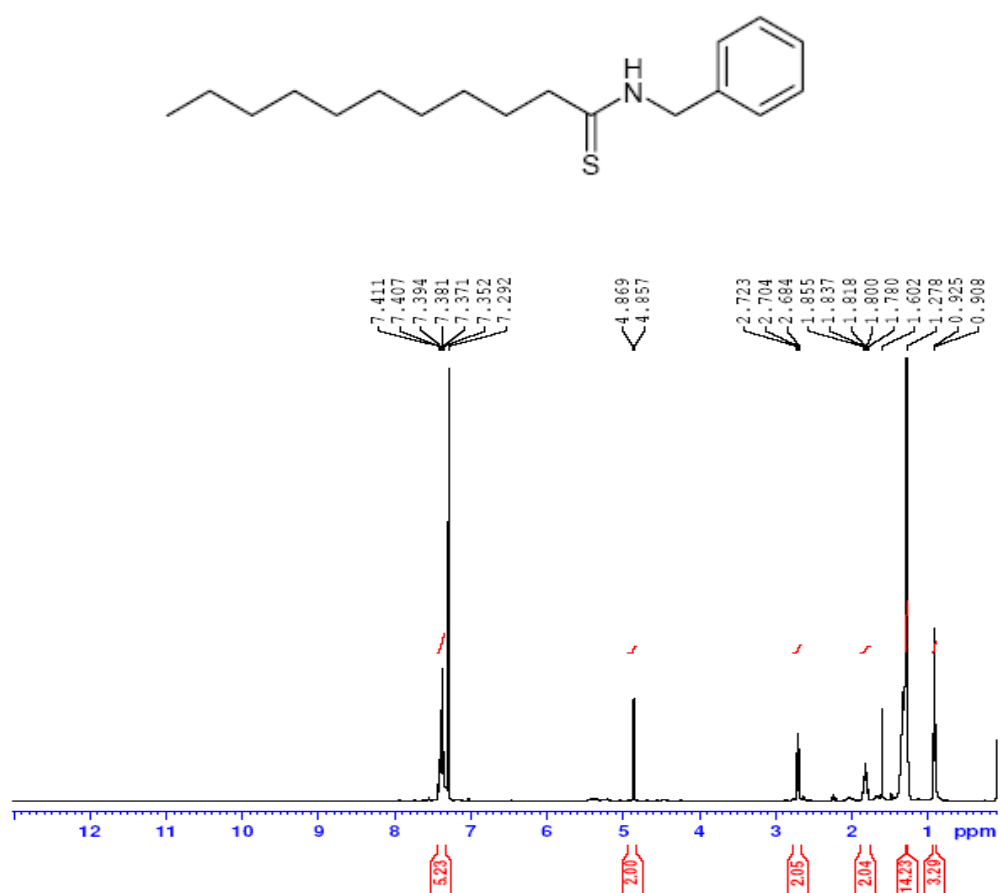

<sup>13</sup>C-NMR 3i

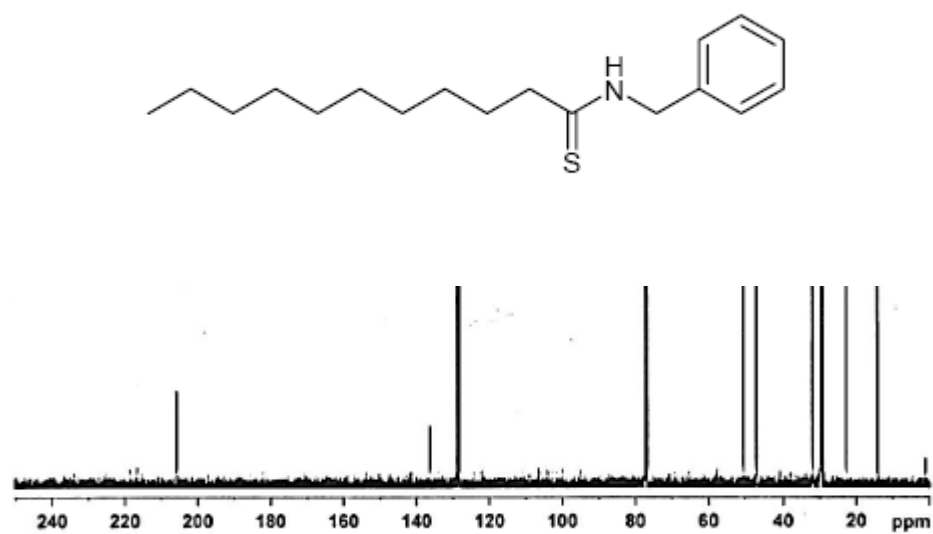

<sup>1</sup>H-NMR 3j

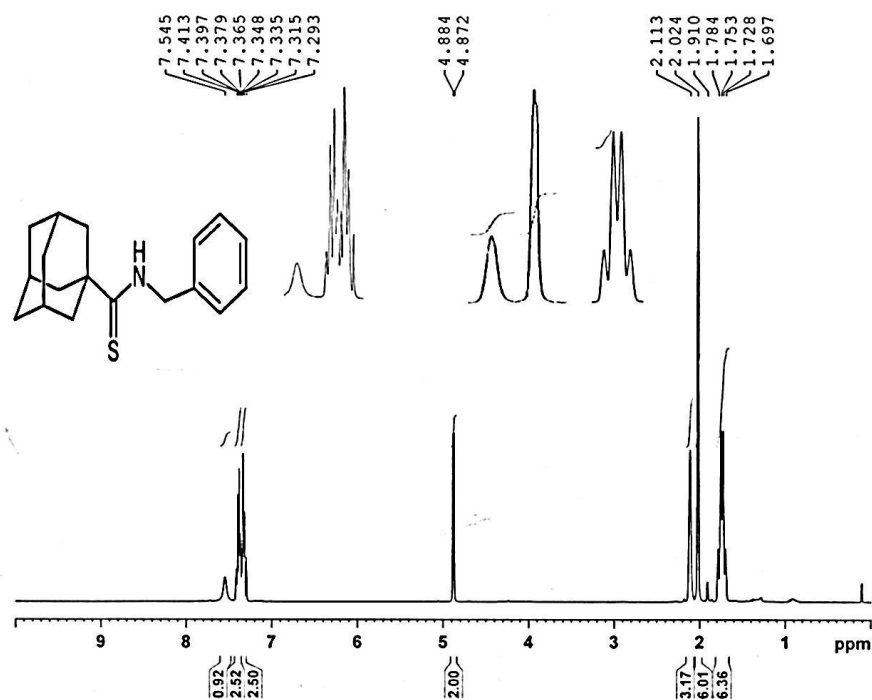

<sup>13</sup>C-NMR 3j

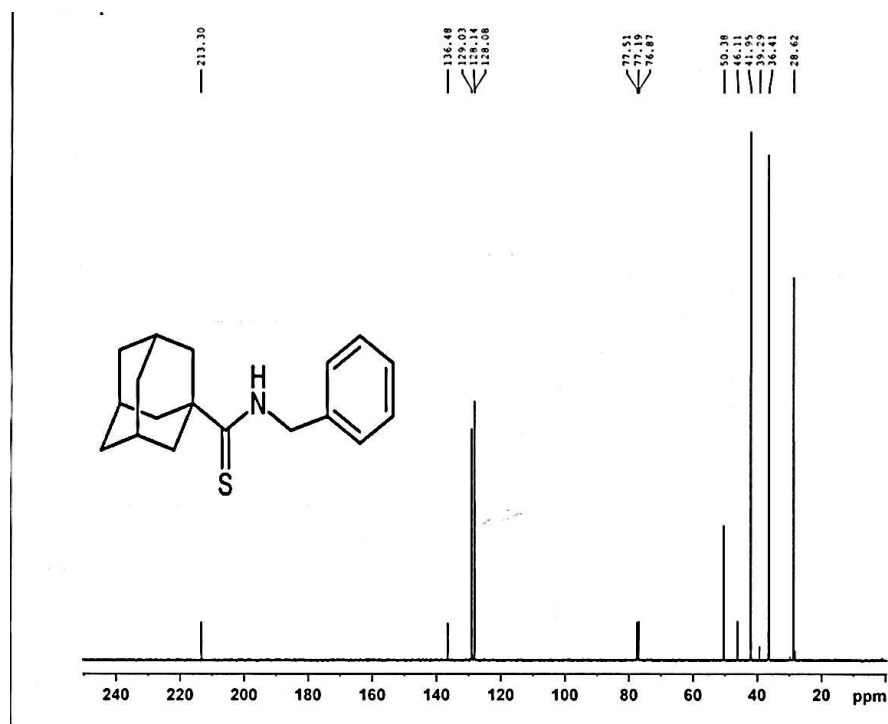

<sup>1</sup>H-NMR 3k

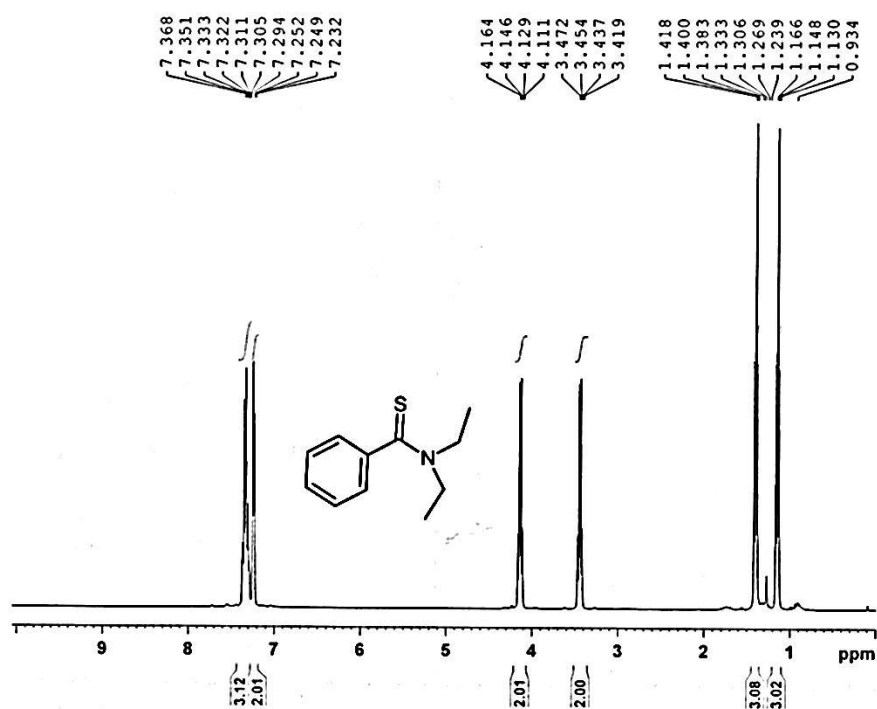

<sup>13</sup>C-NMR 3k

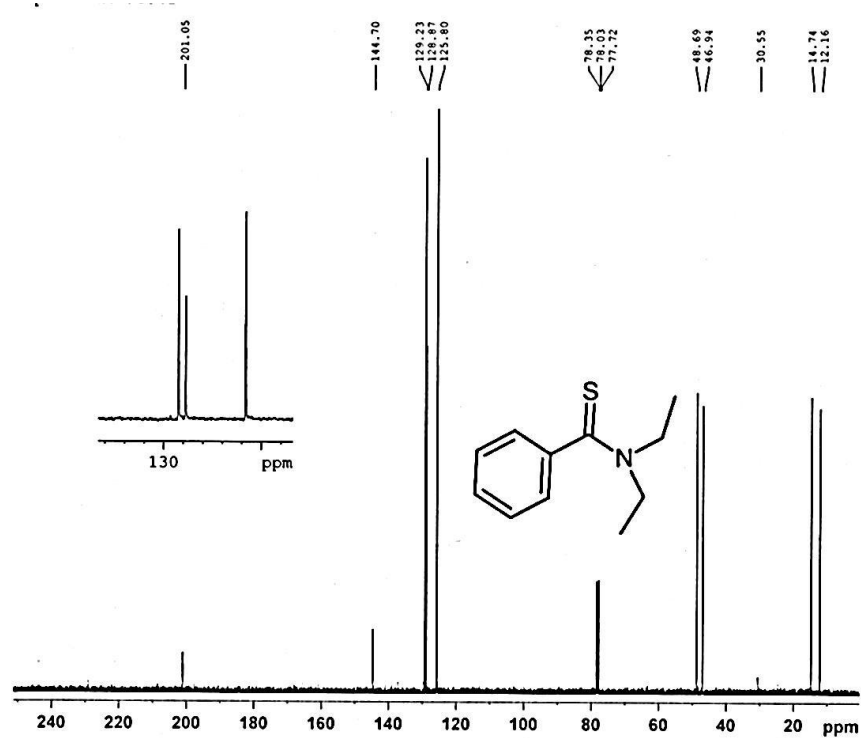

<sup>1</sup>H-NMR 3l

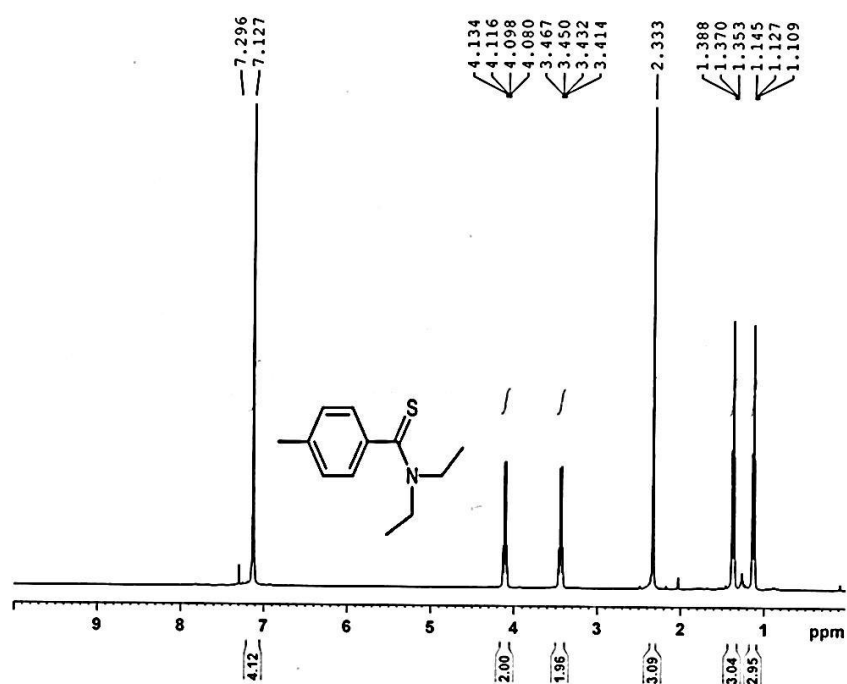

<sup>13</sup>C-NMR **3l**

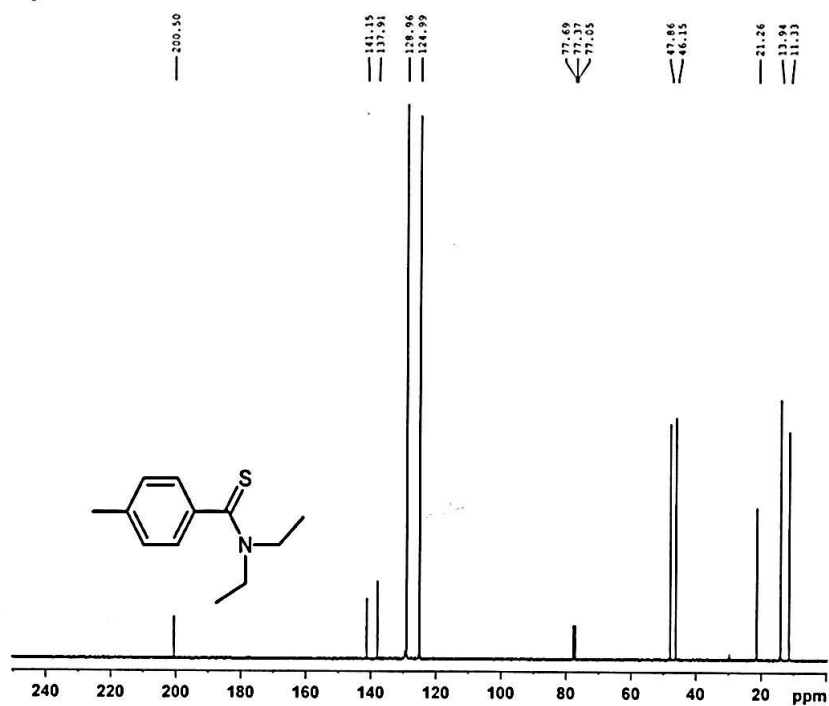

<sup>1</sup>H-NMR **3m**

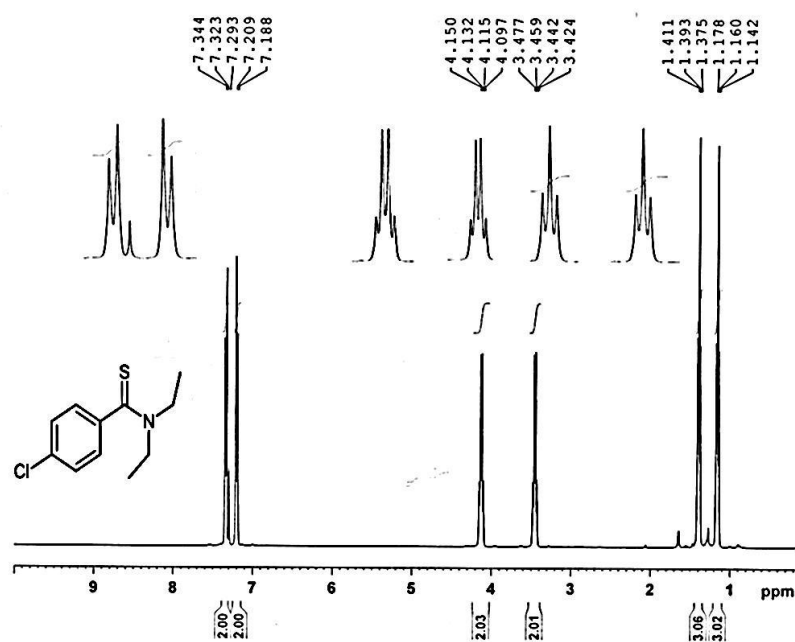

<sup>13</sup>C-NMR **3m**

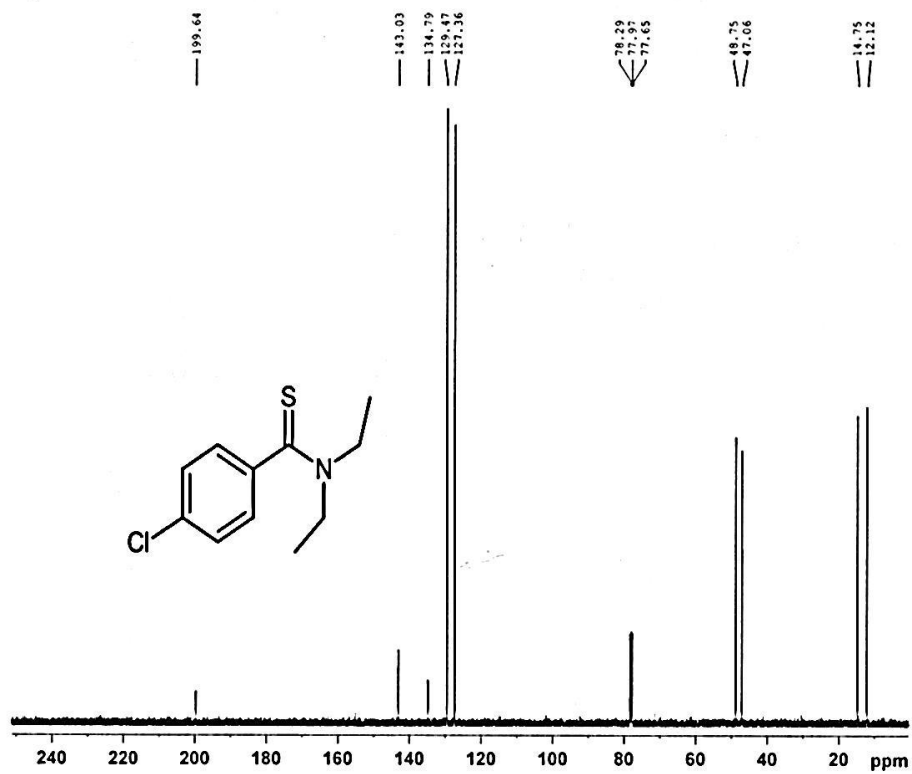

<sup>1</sup>H-NMR **3n**

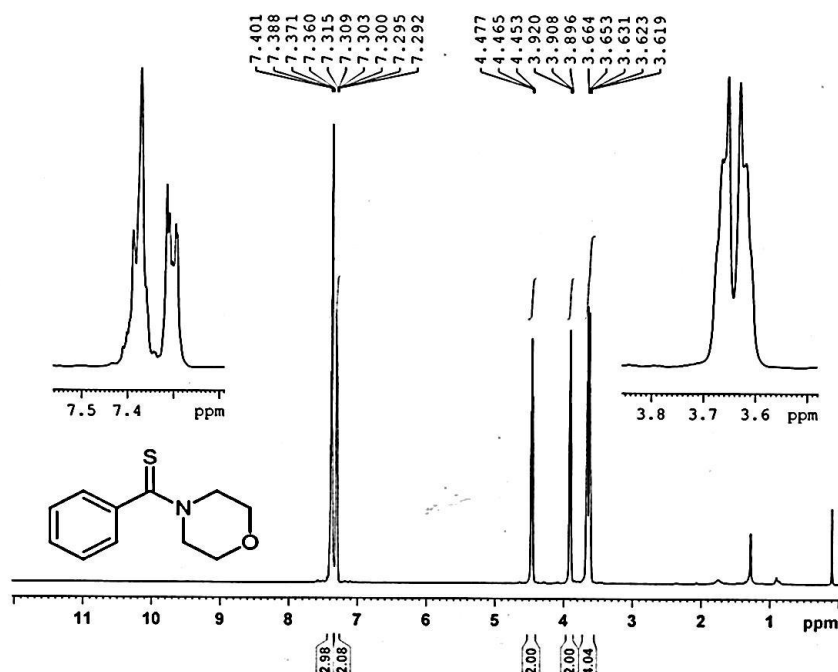

<sup>13</sup>C-NMR 3n

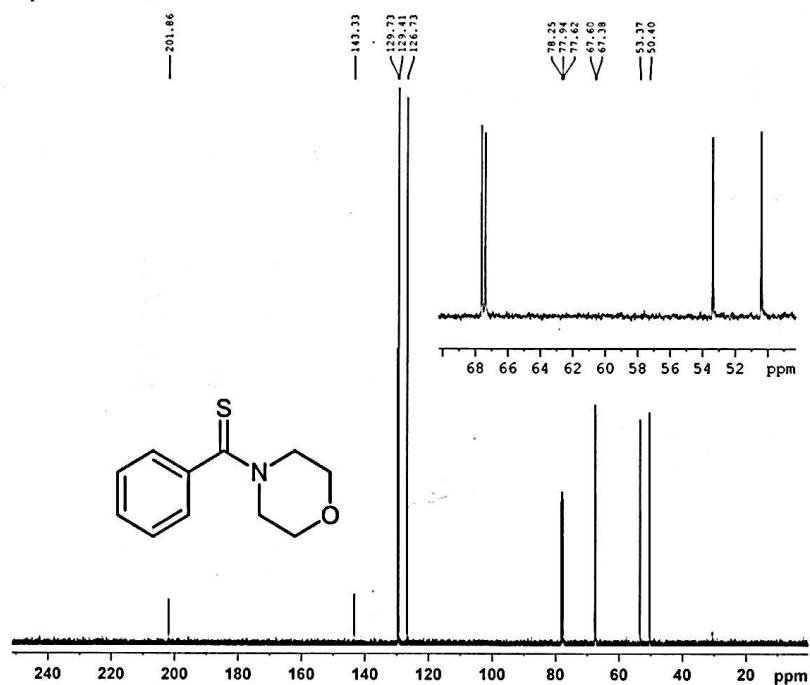

<sup>1</sup>H-NMR 3o



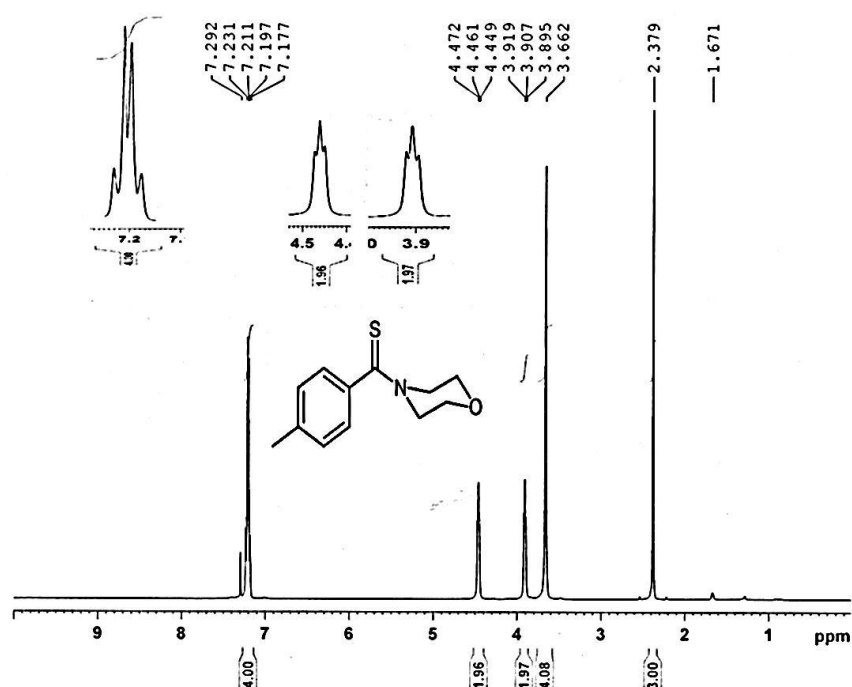

<sup>13</sup>C-NMR **30**

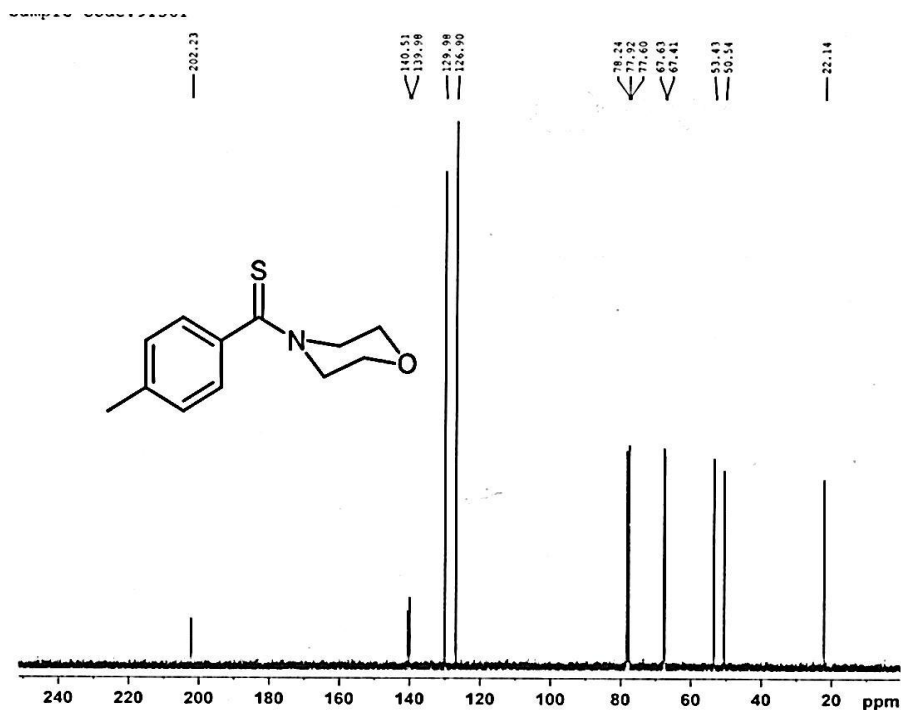

<sup>1</sup>H-NMR **3p**

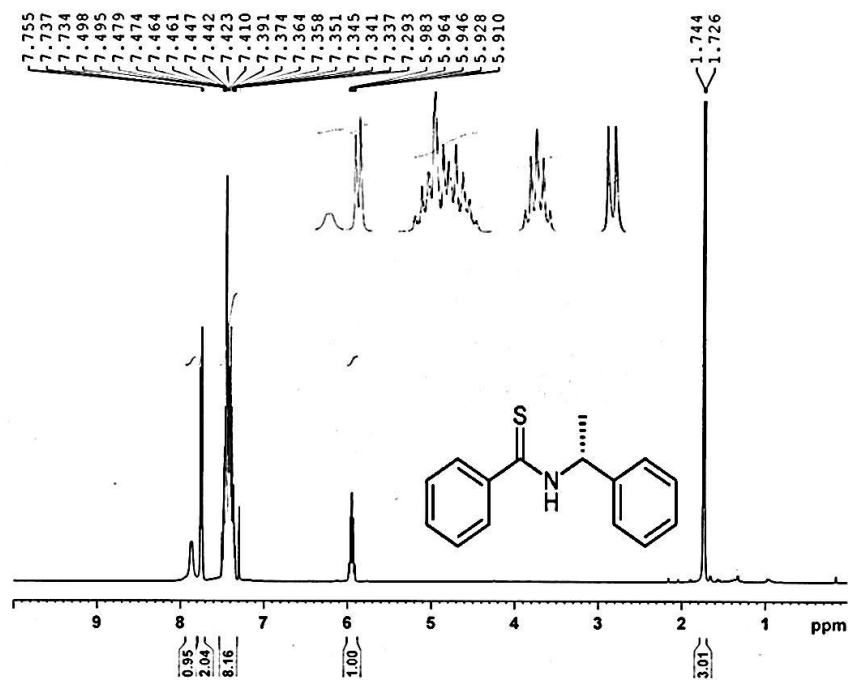

<sup>13</sup>C-NMR 3p

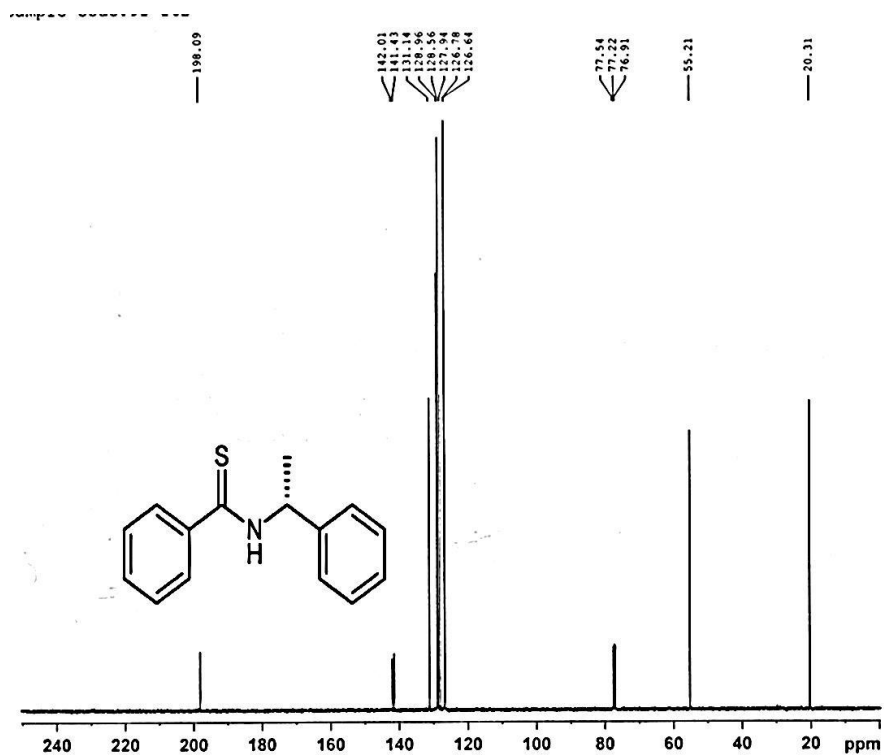

<sup>13</sup>H-NMR 3q

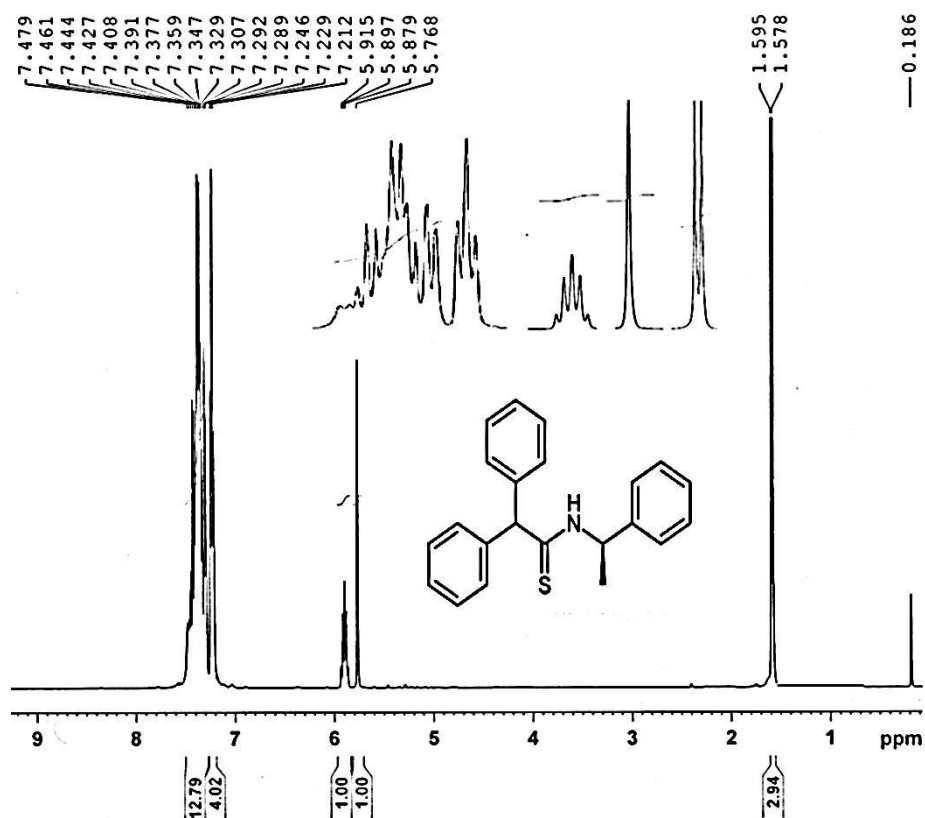

<sup>13</sup>C-NMR **3q**

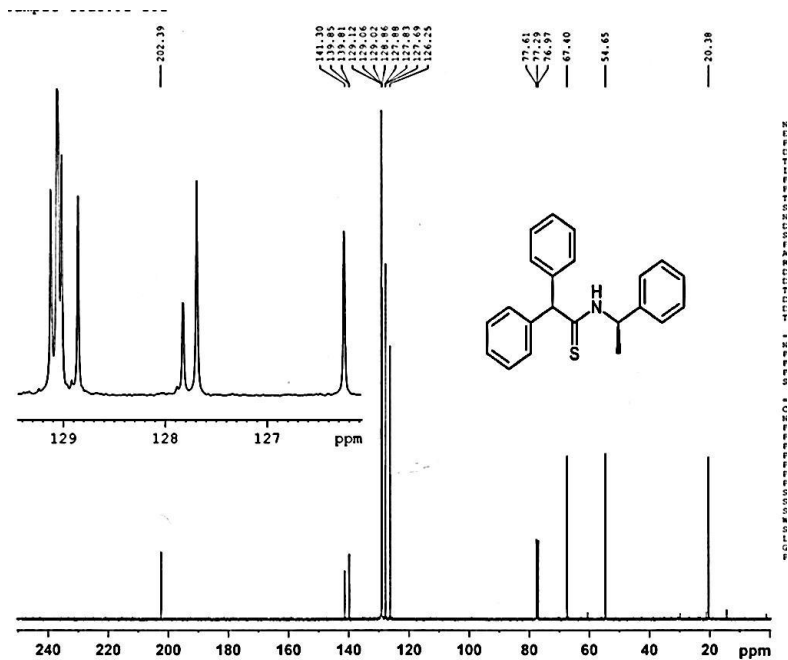

<sup>1</sup>H-NMR **4**

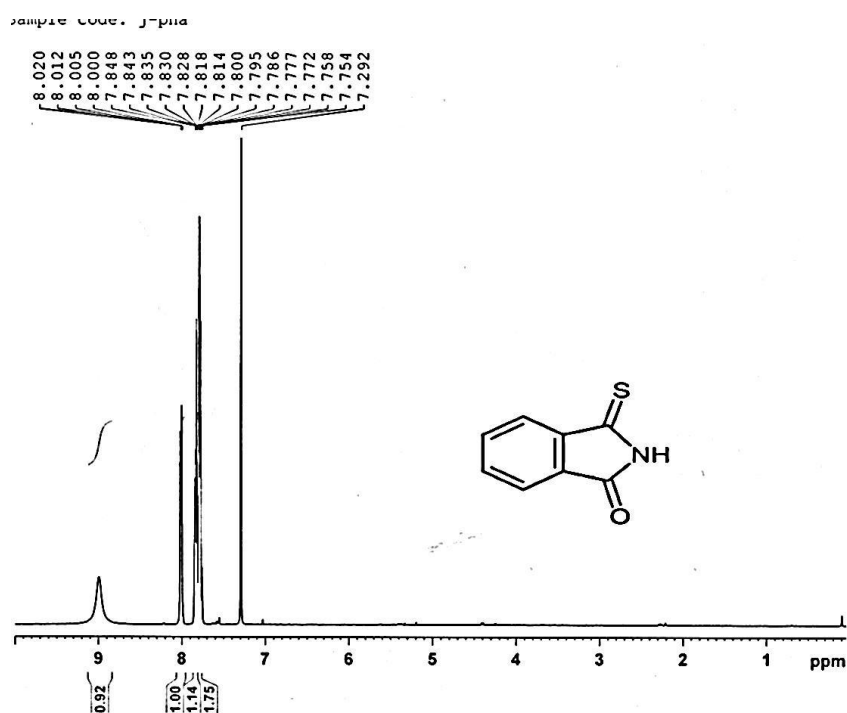

#### $^{13}\text{C}$ -NMR 4

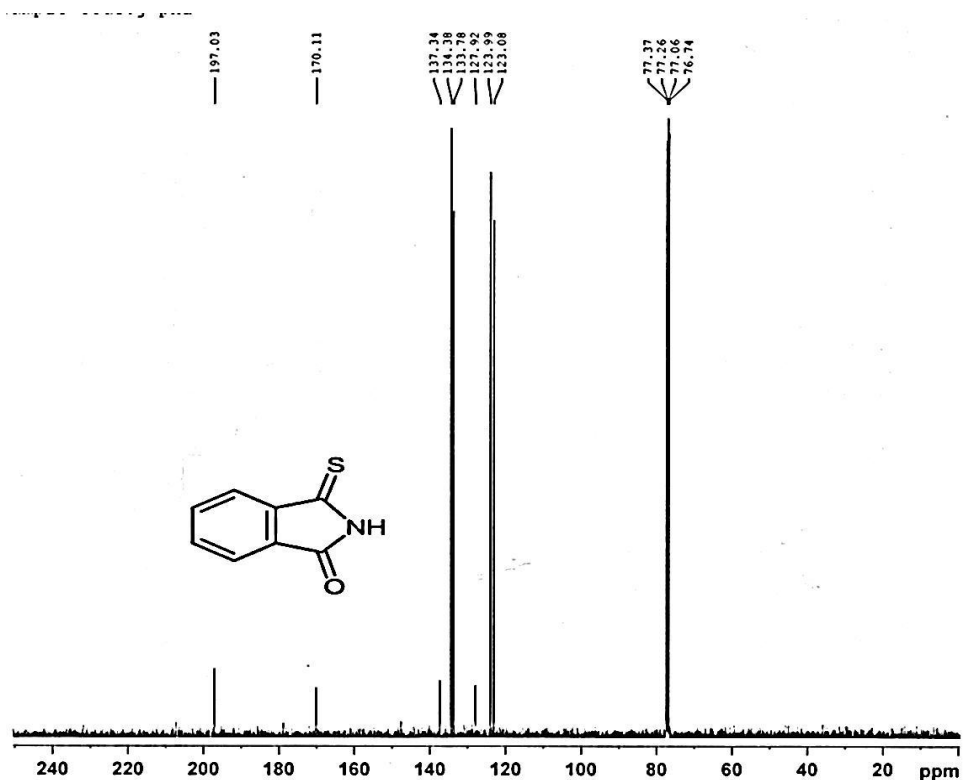

#### $^1\text{H}$ -NMR 5

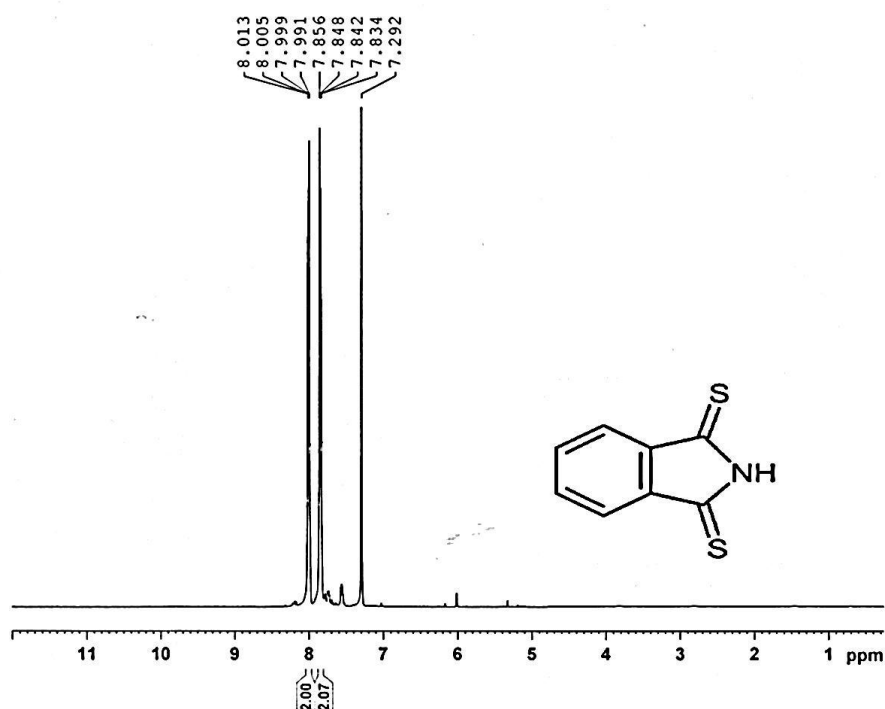

### <sup>13</sup>C-NMR 5

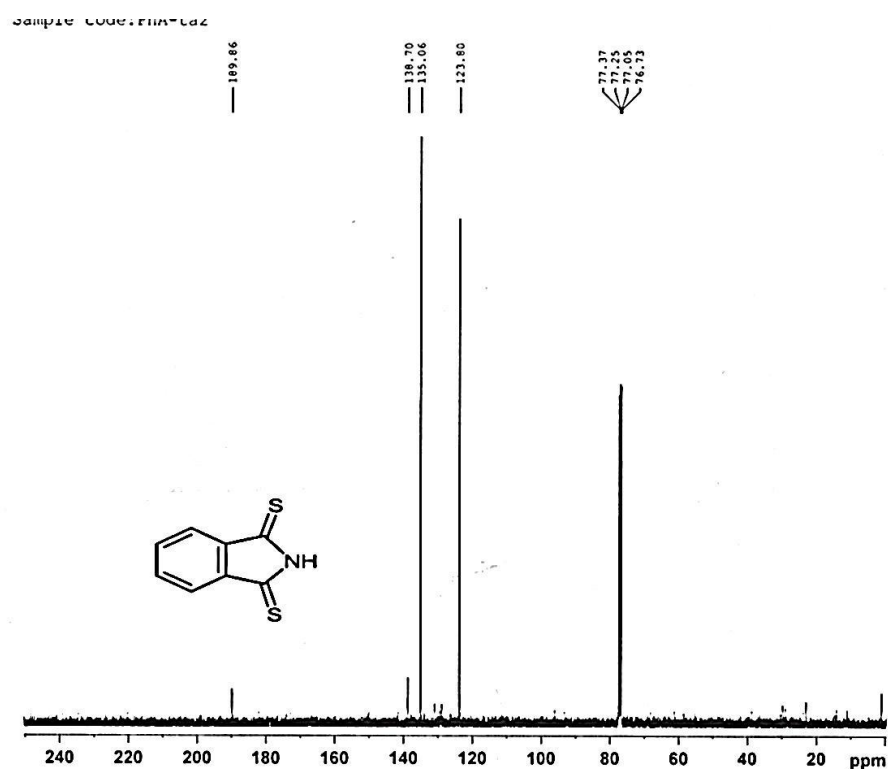

### <sup>1</sup>H-NMR 6

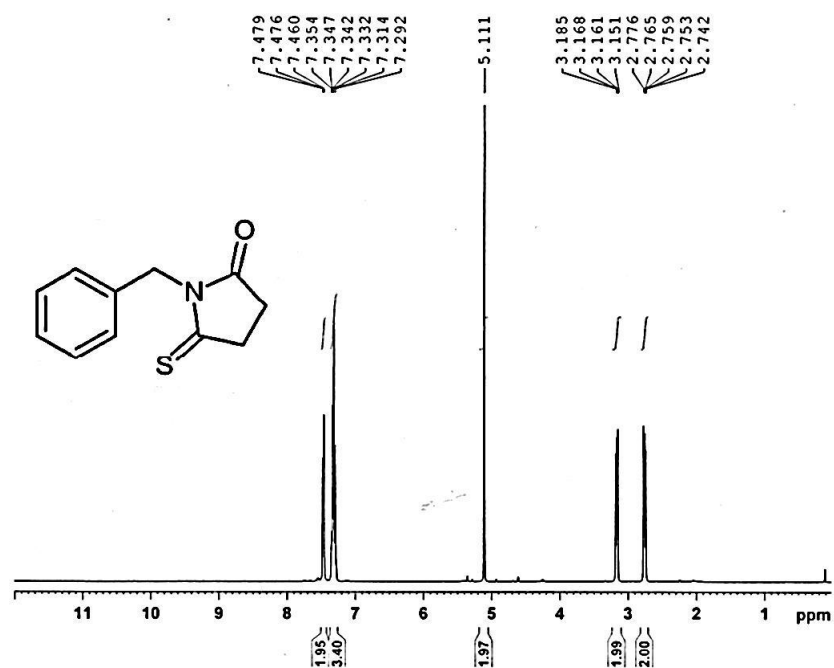

<sup>13</sup>C-NMR 6

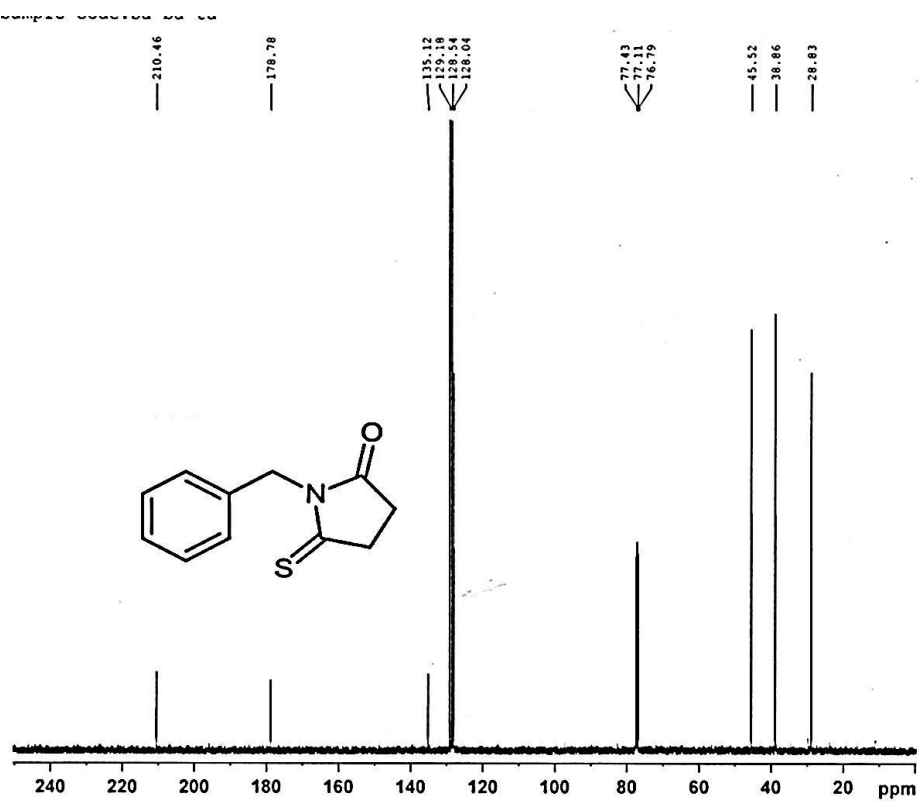

# <sup>1</sup>H-NMR **7b**

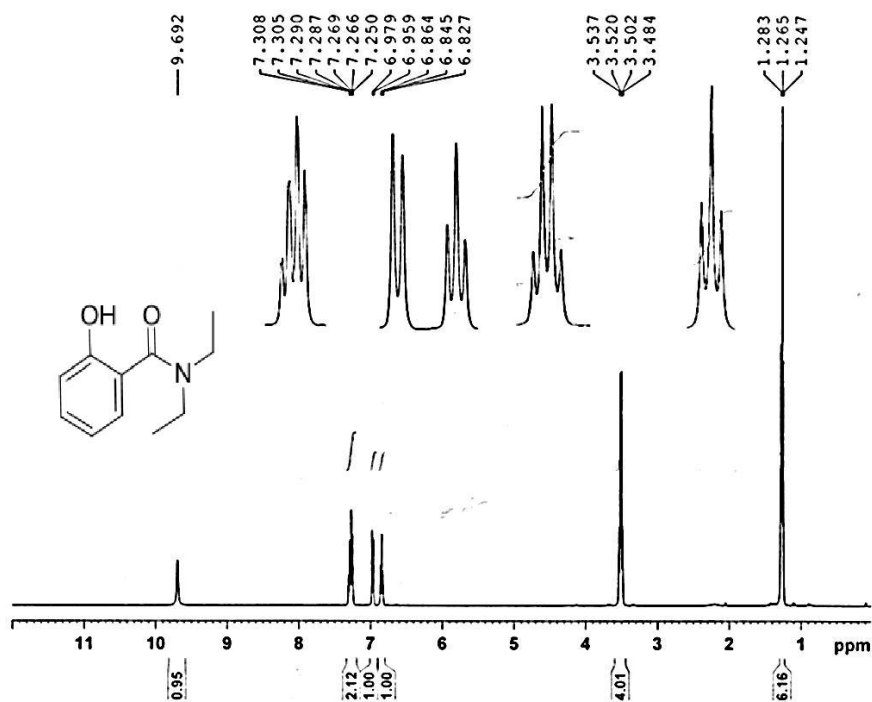

# <sup>13</sup>C-NMR of compound **7b**

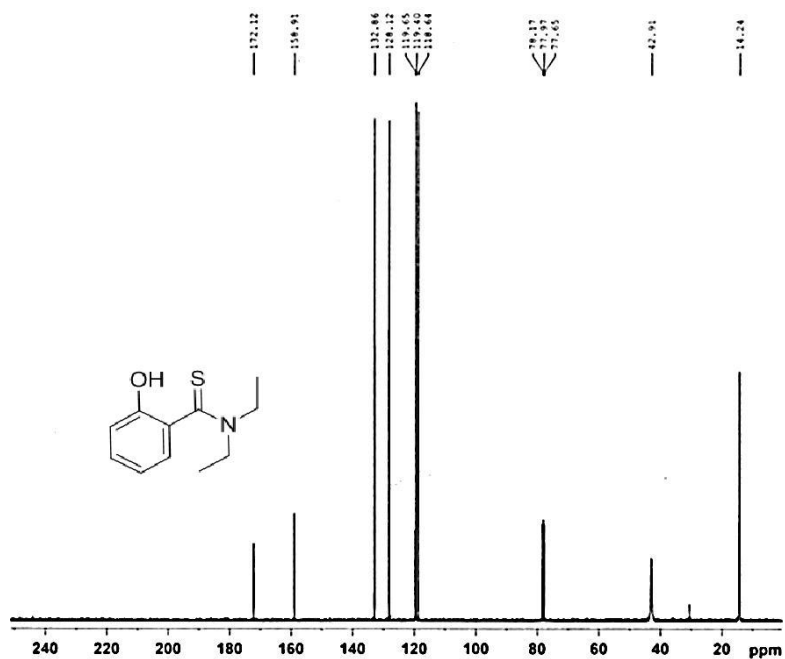

Supplement: c3ra23414b.pdf [file c3ra23414b.pdf]
